# Supplementary material for: Mathematical modelling of oxygen gradients in stem cell-derived liver tissue
Source: PubMed Central journal article supplement (PMC7870006; doi:10.1371/journal.pone.0244070), 2021-02-08
Supplement: pone.0244070.s001.pdf [file pone.0244070.s001.pdf]

## SUPPLEMENTARY MATERIAL

### Mathematical modelling of oxygen gradients in stem cell-derived liver tissue

Joseph A. Leedale<sup>1</sup>, Baltasar Lucendo-Villarin<sup>2</sup>, Jose Meseguer-Ripolles<sup>2</sup>, Alvilė Kasarinaite<sup>2</sup>, Steven D. Webb<sup>3,4</sup>, David C. Hay<sup>2</sup>

<sup>1</sup>Dept. of Mathematical Sciences, University of Liverpool, Liverpool, L69 7ZL, UK

<sup>2</sup>MRC Centre for Regenerative Medicine, University of Edinburgh, Edinburgh, EH16 4UU, UK

<sup>3</sup>Dept. of Applied Mathematics, Liverpool John Moores University, Liverpool, L3 3AF, UK

<sup>4</sup>Current address: Syngenta, Early Stage Research, Product Safety, Jealott's Hill, Bracknell, Berkshire, RG42 6EY, UK

### Contents

|     |                                                                         |   |
|-----|-------------------------------------------------------------------------|---|
| 1   | Mathematical model .....                                                | 2 |
| 1.1 | Model equations .....                                                   | 2 |
| 1.2 | Boundary conditions .....                                               | 2 |
| 1.3 | Model parameters .....                                                  | 2 |
| 2   | Parameter variation .....                                               | 3 |
| 3   | COMSOL geometry .....                                                   | 4 |
| 4   | Randomly sampled generation of multiple spheroids within the well ..... | 5 |
|     | References .....                                                        | 6 |

## 1 Mathematical model

### 1.1 Model equations

$$\frac{\partial C}{\partial t} = D_{sph} \nabla^2 C - \frac{V_{max} C}{C + K_m}, \quad \text{In the spheroid,} \quad (1)$$

$$\frac{\partial C}{\partial t} = D_{med} \nabla^2 C, \quad \text{In the media.} \quad (2)$$

### 1.2 Boundary conditions

$$C = C_A, \quad \text{At the air/media interface,} \quad (3)$$

$$\nabla C \cdot \mathbf{n} = 0, \quad \text{At the well/media interface,} \quad (4)$$

$$C_{sph} = C_{med}, \quad \text{At the media/spheroid interface,} \quad (5)$$

$$D_{sph} \nabla C_{sph} = D_{med} \nabla C_{med}, \quad \text{At the media/spheroid interface.} \quad (6)$$

### 1.3 Model parameters

| Model parameter | Value                                                 | Reference |
|-----------------|-------------------------------------------------------|-----------|
| $D_{sph}$       | $1.60 \times 10^{-9} \text{ m}^2/\text{s}$            | [1, 2]    |
| $D_{med}$       | $4.85 \times 10^{-9} \text{ m}^2/\text{s}$            | [1, 2]    |
| $V_{max}$       | $4.10 \times 10^{-2} \text{ mol}/\text{m}^3/\text{s}$ | [3]       |
| $K_m$           | $6.24 \times 10^{-3} \text{ mol}/\text{m}^3$          | [2, 4]    |

Table 1: Parameter values for the main model.

## 2 Parameter variation

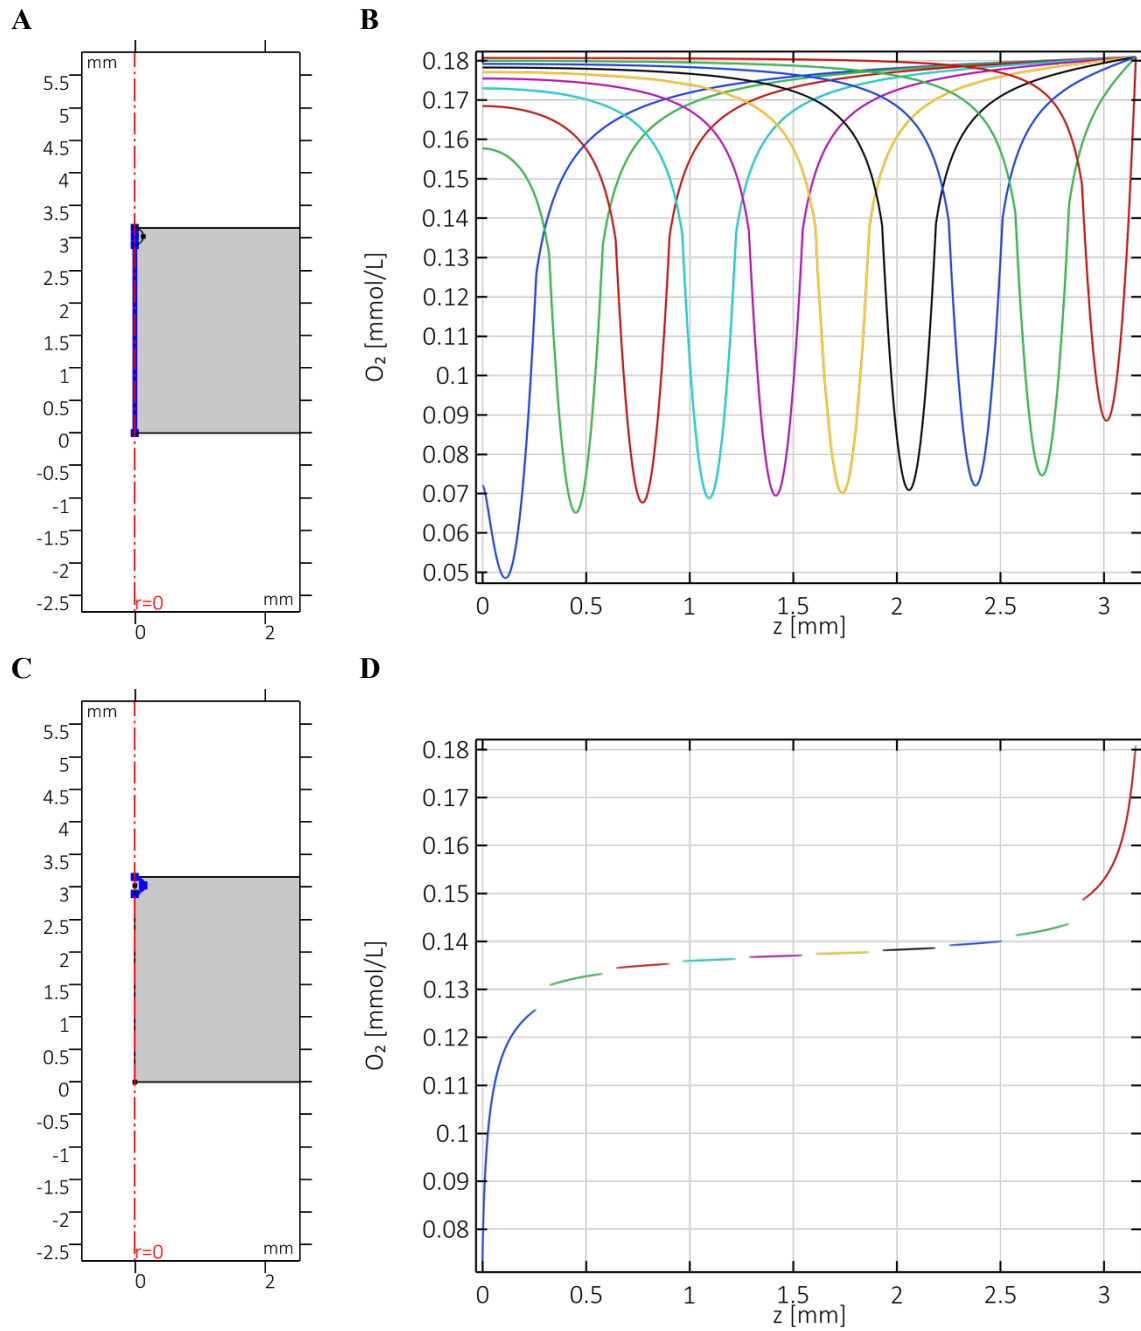

Figure S1: Oxygen profiles along 1D lines either through the central axis of the well (A,B) or around the boundary of the sphere (C,D) for various spheroid heights within the well for a spheroid of radius  $130\ \mu\text{m}$ .

### 3 COMSOL geometry

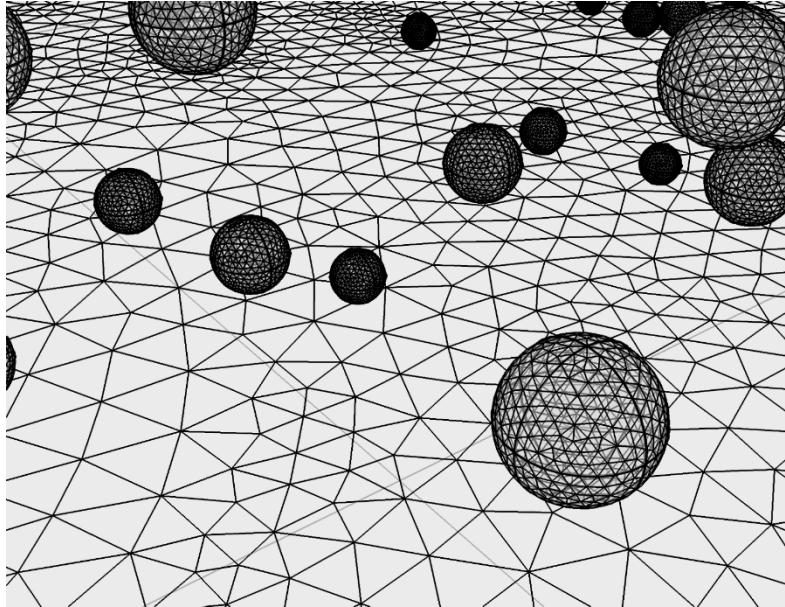

Figure S2: Sample of model geometry in COMSOL with “extremely fine” mesh. Image shows multiple randomly arrayed spheroids within the media.

## 4 Randomly sampled generation of multiple spheroids within the well

A

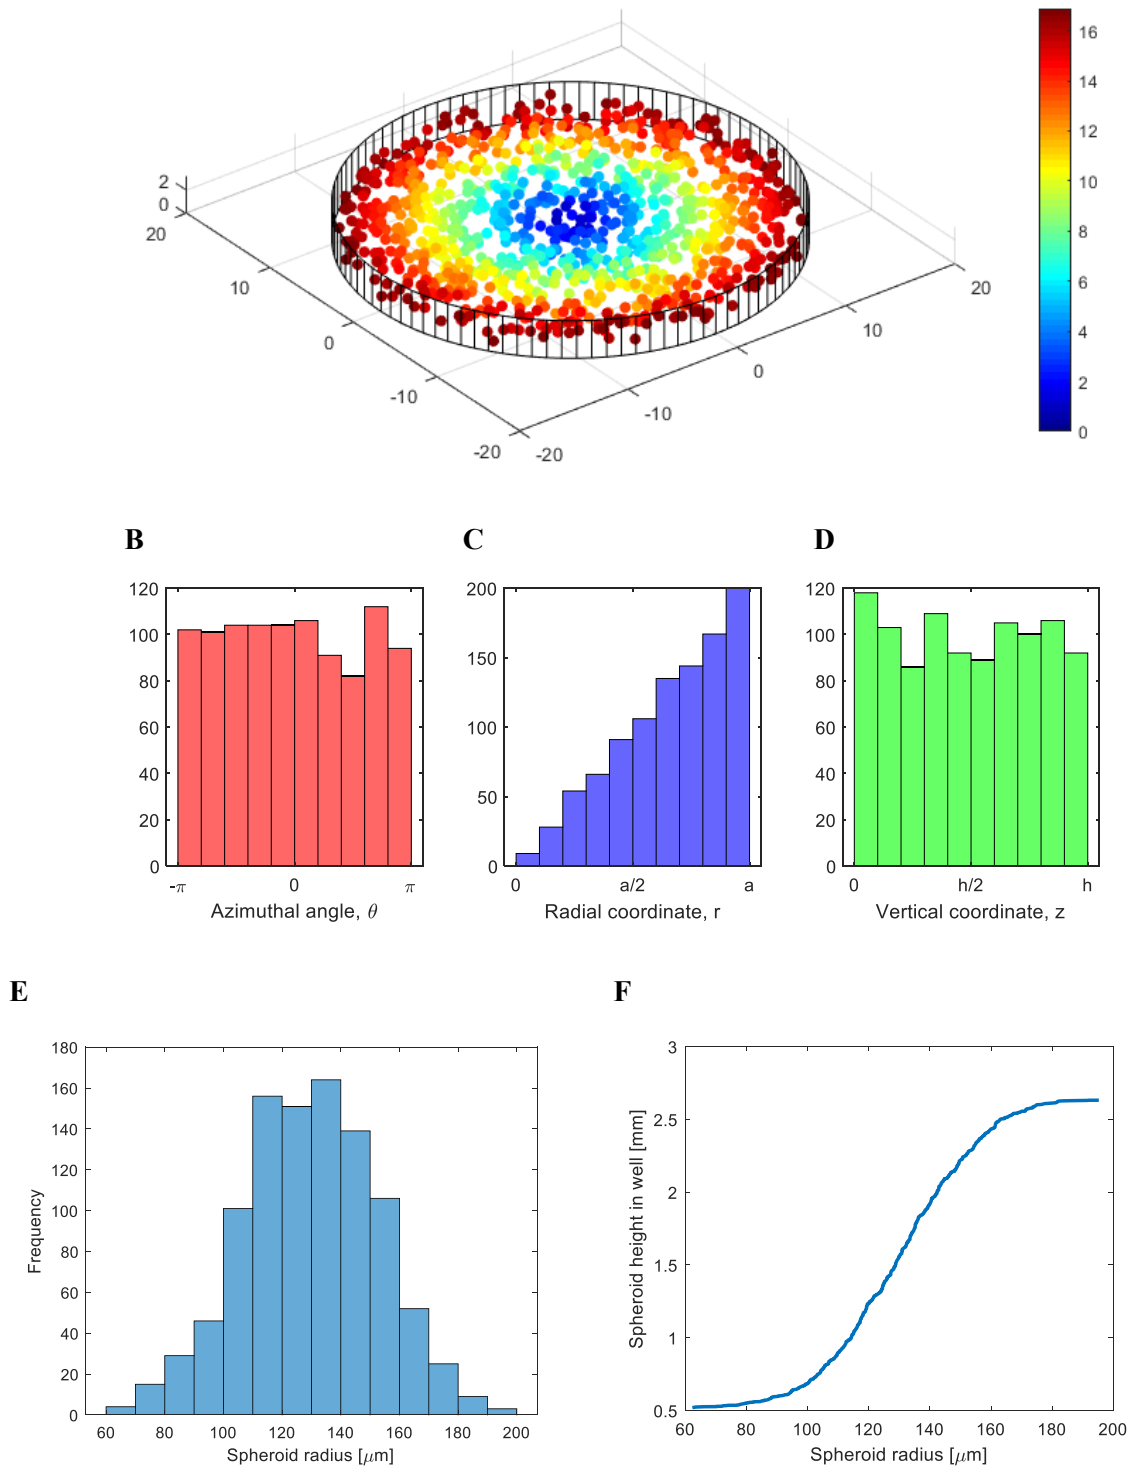

Figure S3: A: 1,000 randomly assigned spheroid coordinates within a virtual well assuming a uniform spatial distribution. Corresponding probability density functions are given for cylindrical coordinates  $\theta$  (B),  $r$  (C), and  $z$  (D). E: Randomly generated normal distribution for spheroid radii given mean (129.71  $\mu\text{m}$ ) and SD (22.85  $\mu\text{m}$ ) measurements. F: Spheroid radii are assigned to each positional coordinate in 3D space based upon the spheroid height ( $z$ ).

## References

1. Leedale, J., et al., *Modeling the dynamics of hypoxia inducible factor-1 $\alpha$  (HIF-1 $\alpha$ ) within single cells and 3D cell culture systems*. *Mathematical biosciences*, 2014. **258**: p. 33-43.
2. Leedale, J., et al., *In silico-guided optimisation of oxygen gradients in hepatic spheroids*. *Computational Toxicology*, 2019. **12**.
3. Yu, Y., et al., *Hepatocyte-like cells differentiated from human induced pluripotent stem cells: relevance to cellular therapies*. *Stem cell research*, 2012. **9**(3): p. 196-207.
4. Shipley, R., et al., *A strategy to determine operating parameters in tissue engineering hollow fiber bioreactors*. *Biotechnology and bioengineering*, 2011. **108**(6): p. 1450-1461.
